# Supplementary material
Source: Springer Nature journal article supplement (https://www.springermedizin.de/resource/supplementary/12967_2010_555_MOESM2_ESM.pdf/9576506)

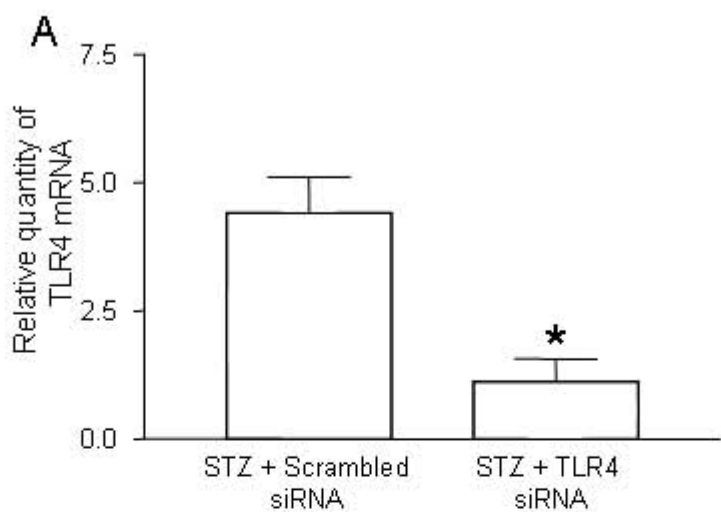

**B**

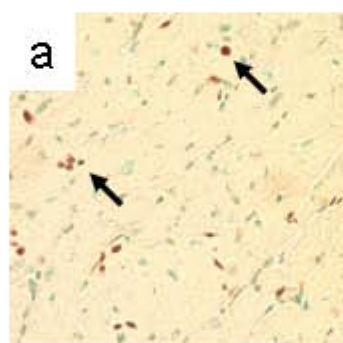

STZ + Scrambled siRNA

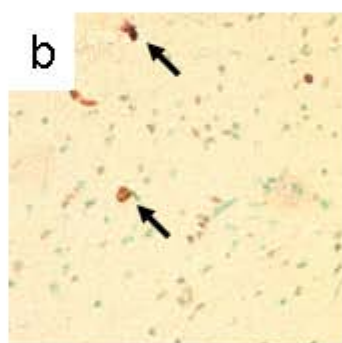

STZ + TLR4 siRNA

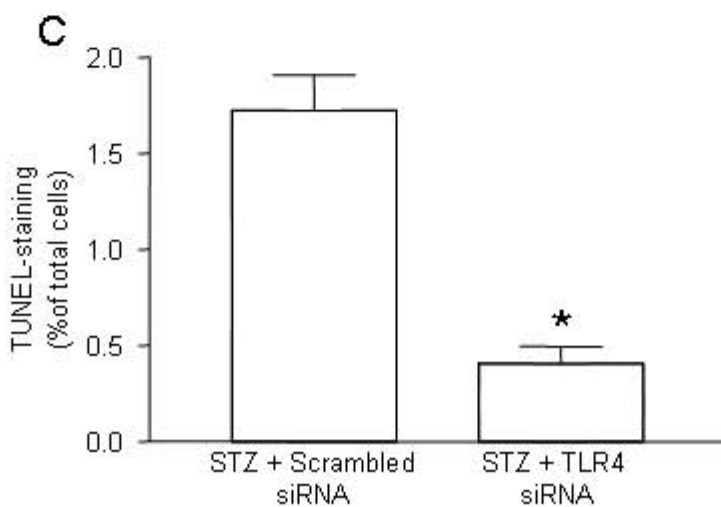

Supplement: MOESM2 [file 9576506]
